# Supplementary material for: One-step fabrication of nanosized LiFePO4/expanded graphite composites with a particle growth inhibitor and enhanced electrochemical performance of aqueous Li-ion capacitors
Source: Royal Society of Chemistry journal article supplement (doi:10.1039/c9ra02248a), 2019-01-01
Supplement: c9ra02248a1.pdf [file c9ra02248a1.pdf]

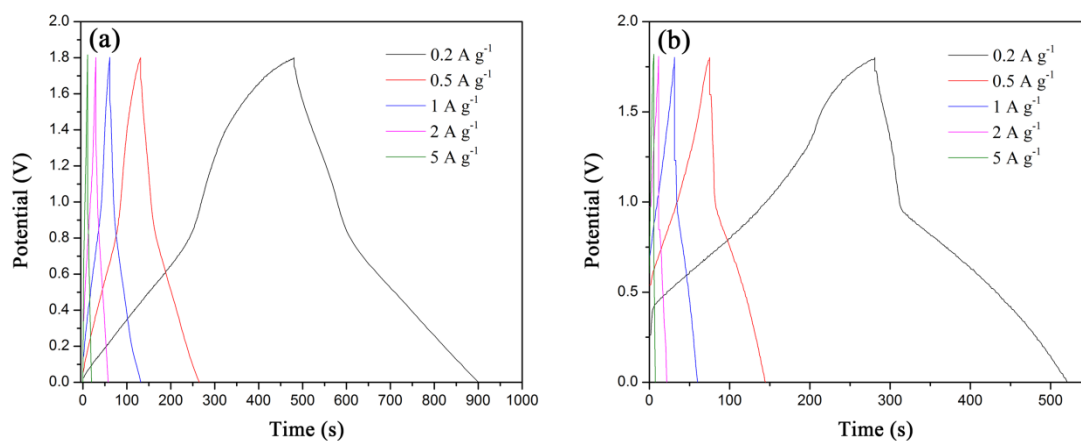

**Fig. S1** (a) Galvanostatic charge-discharge curves of S1//AC LIC and (b) commercial LFP//AC LIC at different current densities

**Table S1**  $C_{pe}$  values of S1-S3

| Sample | $C_{pe}$ (F g <sup>-1</sup> ) | $C_{pe}$ (F g <sup>-1</sup> ) | $C_{pe}$ (F g <sup>-1</sup> ) | $C_{pe}$ (F g <sup>-1</sup> ) | $C_{pe}$ (F g <sup>-1</sup> ) |
|--------|-------------------------------|-------------------------------|-------------------------------|-------------------------------|-------------------------------|
|        | @ 1 mV s <sup>-1</sup>        | @ 5 mV s <sup>-1</sup>        | @ 10 mV s <sup>-1</sup>       | @ 20 mV s <sup>-1</sup>       | @ 50 mV s <sup>-1</sup>       |
| S1     | 1724.34                       | 869.10                        | 578.13                        | 440.29                        | 293.43                        |
| S2     | /                             | /                             | 131.65                        | /                             | /                             |
| S3     | /                             | /                             | 369.53                        | /                             | /                             |
